# Supplementary material
Source: PubMed Central journal article supplement (PMC4912470)

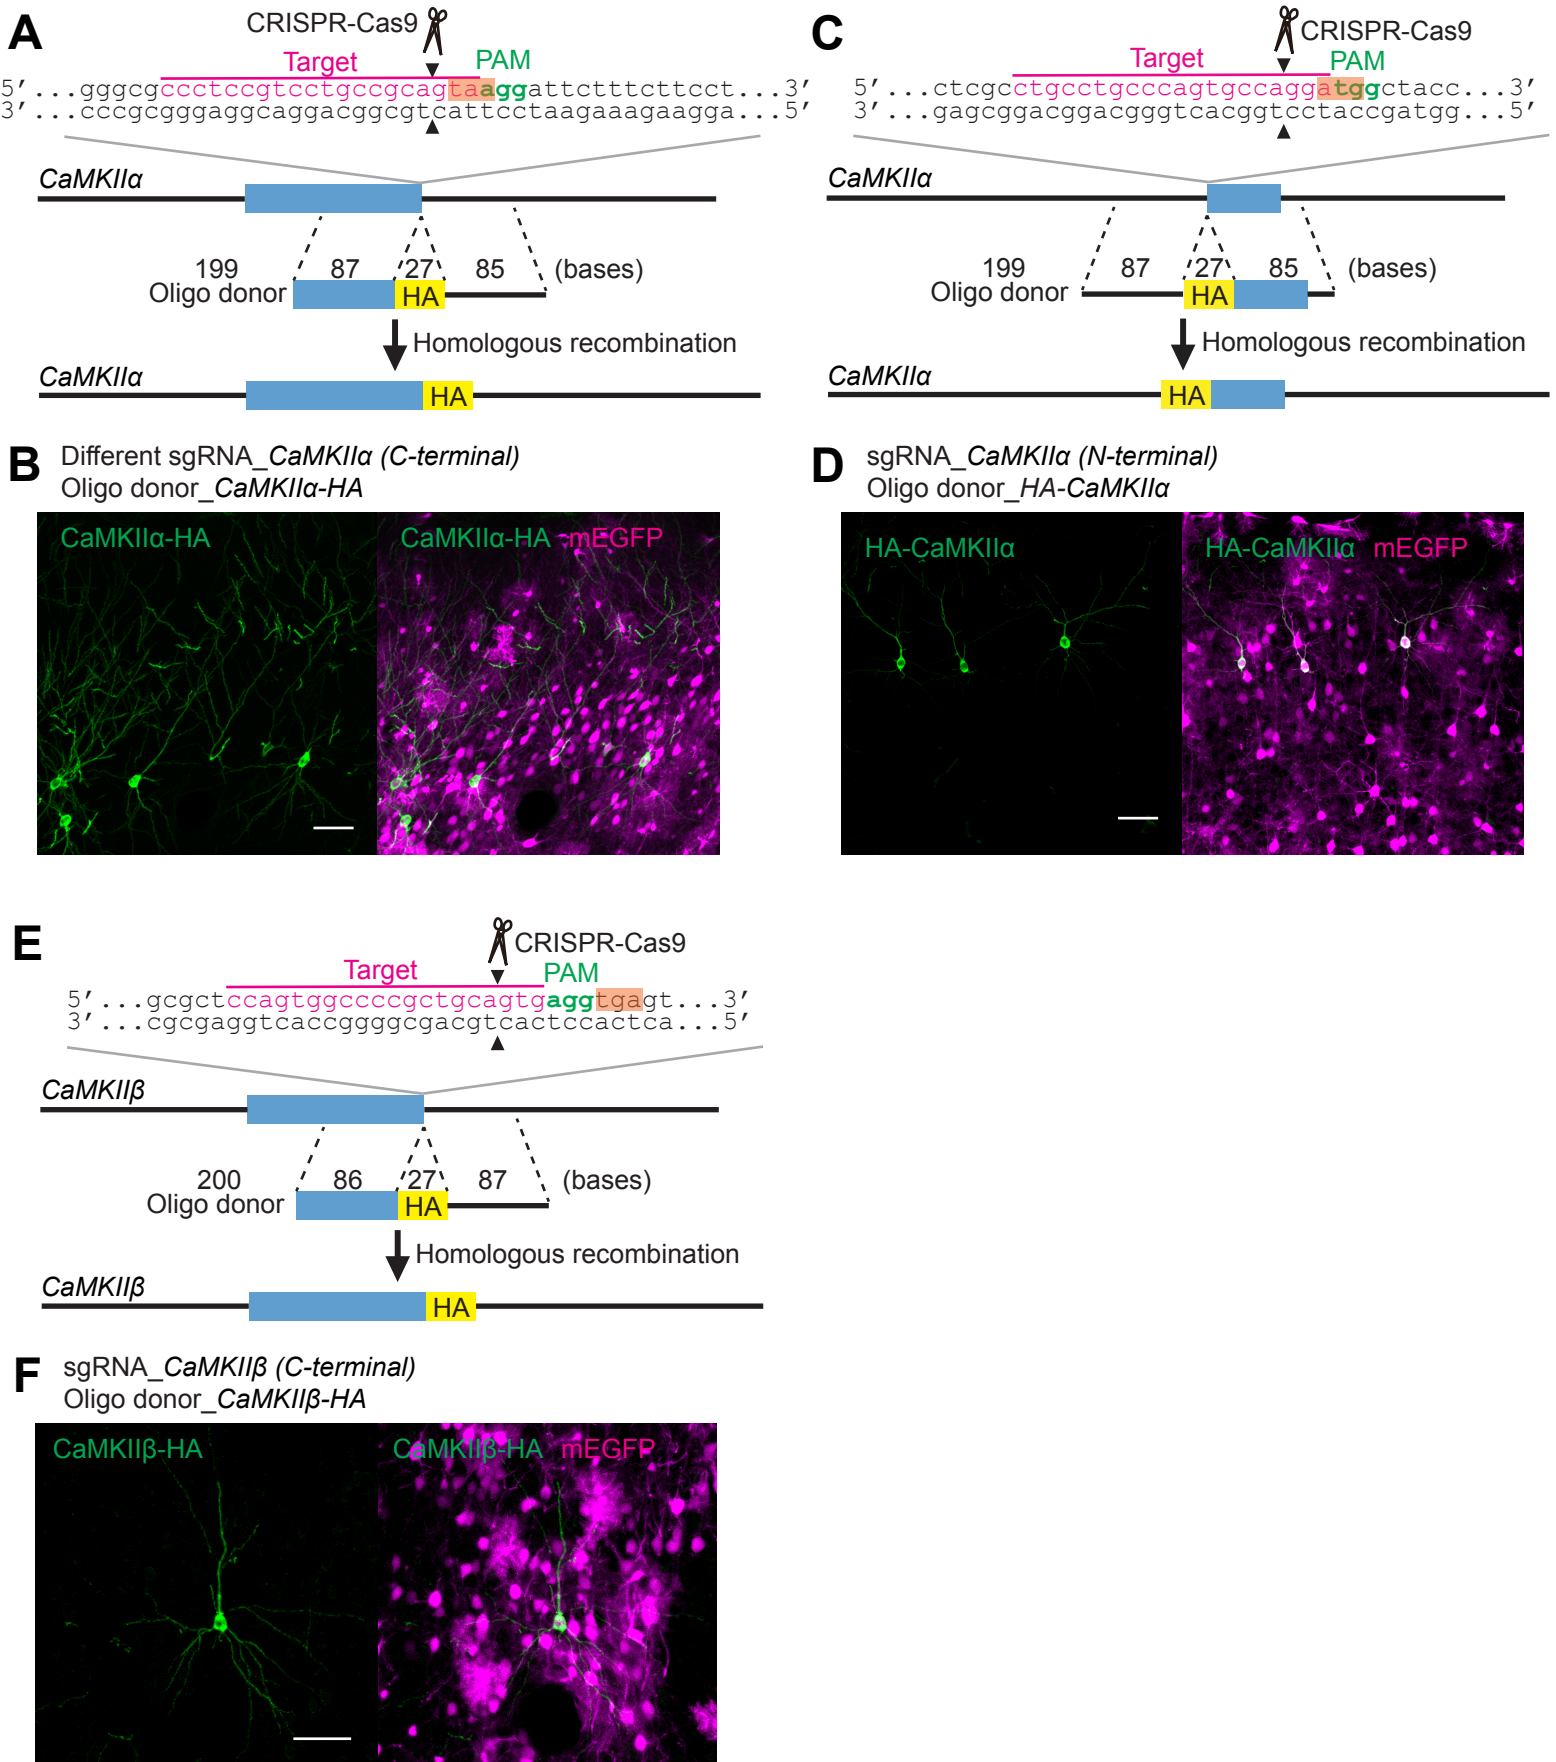

**Figure S1**

Supplement: NIHMS781210-supplement-1.pdf [file NIHMS781210-supplement-1.pdf]

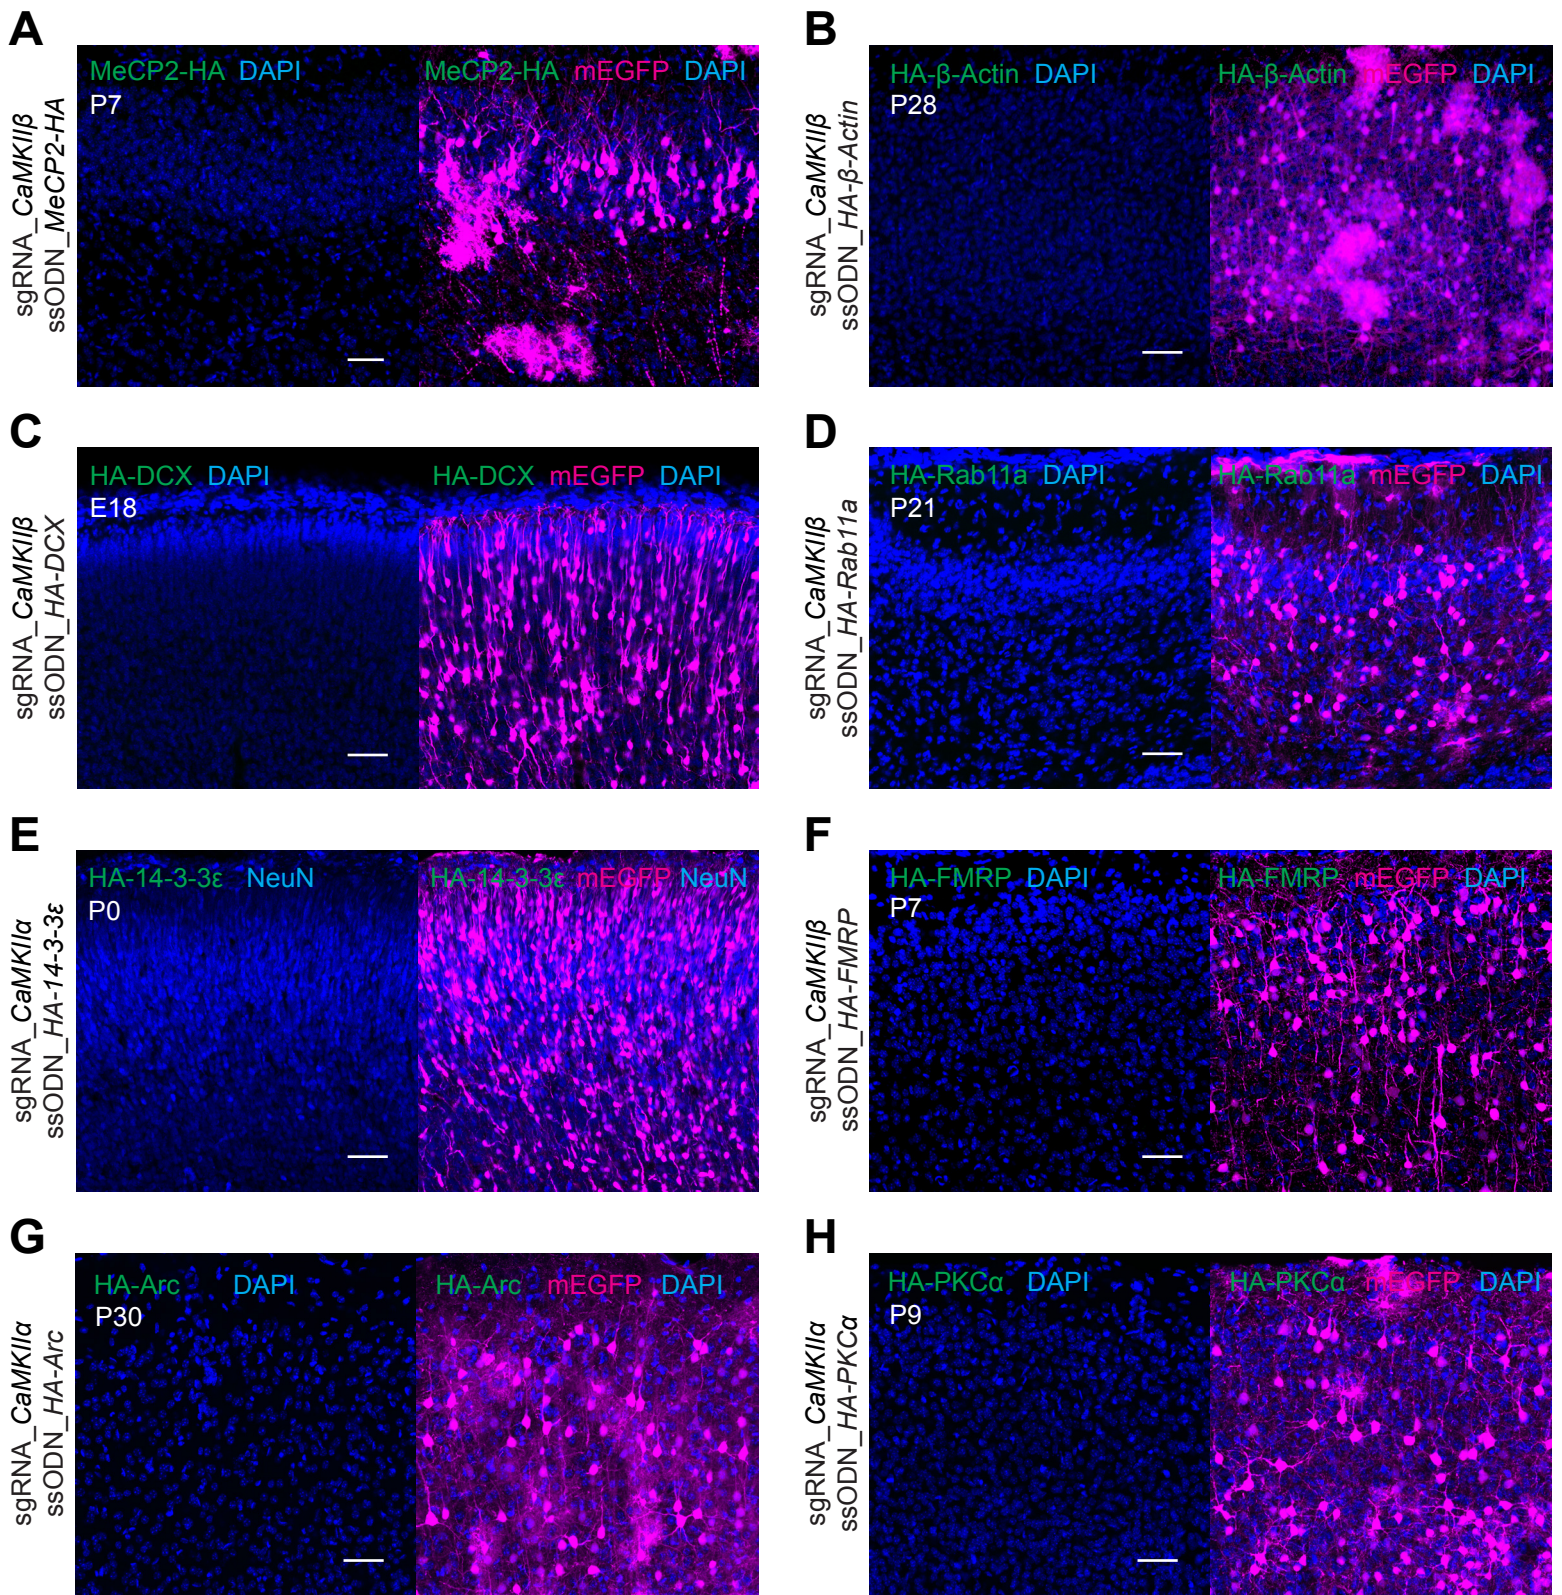

**Figure S2**

Supplement: NIHMS781210-supplement-2.pdf [file NIHMS781210-supplement-2.pdf]

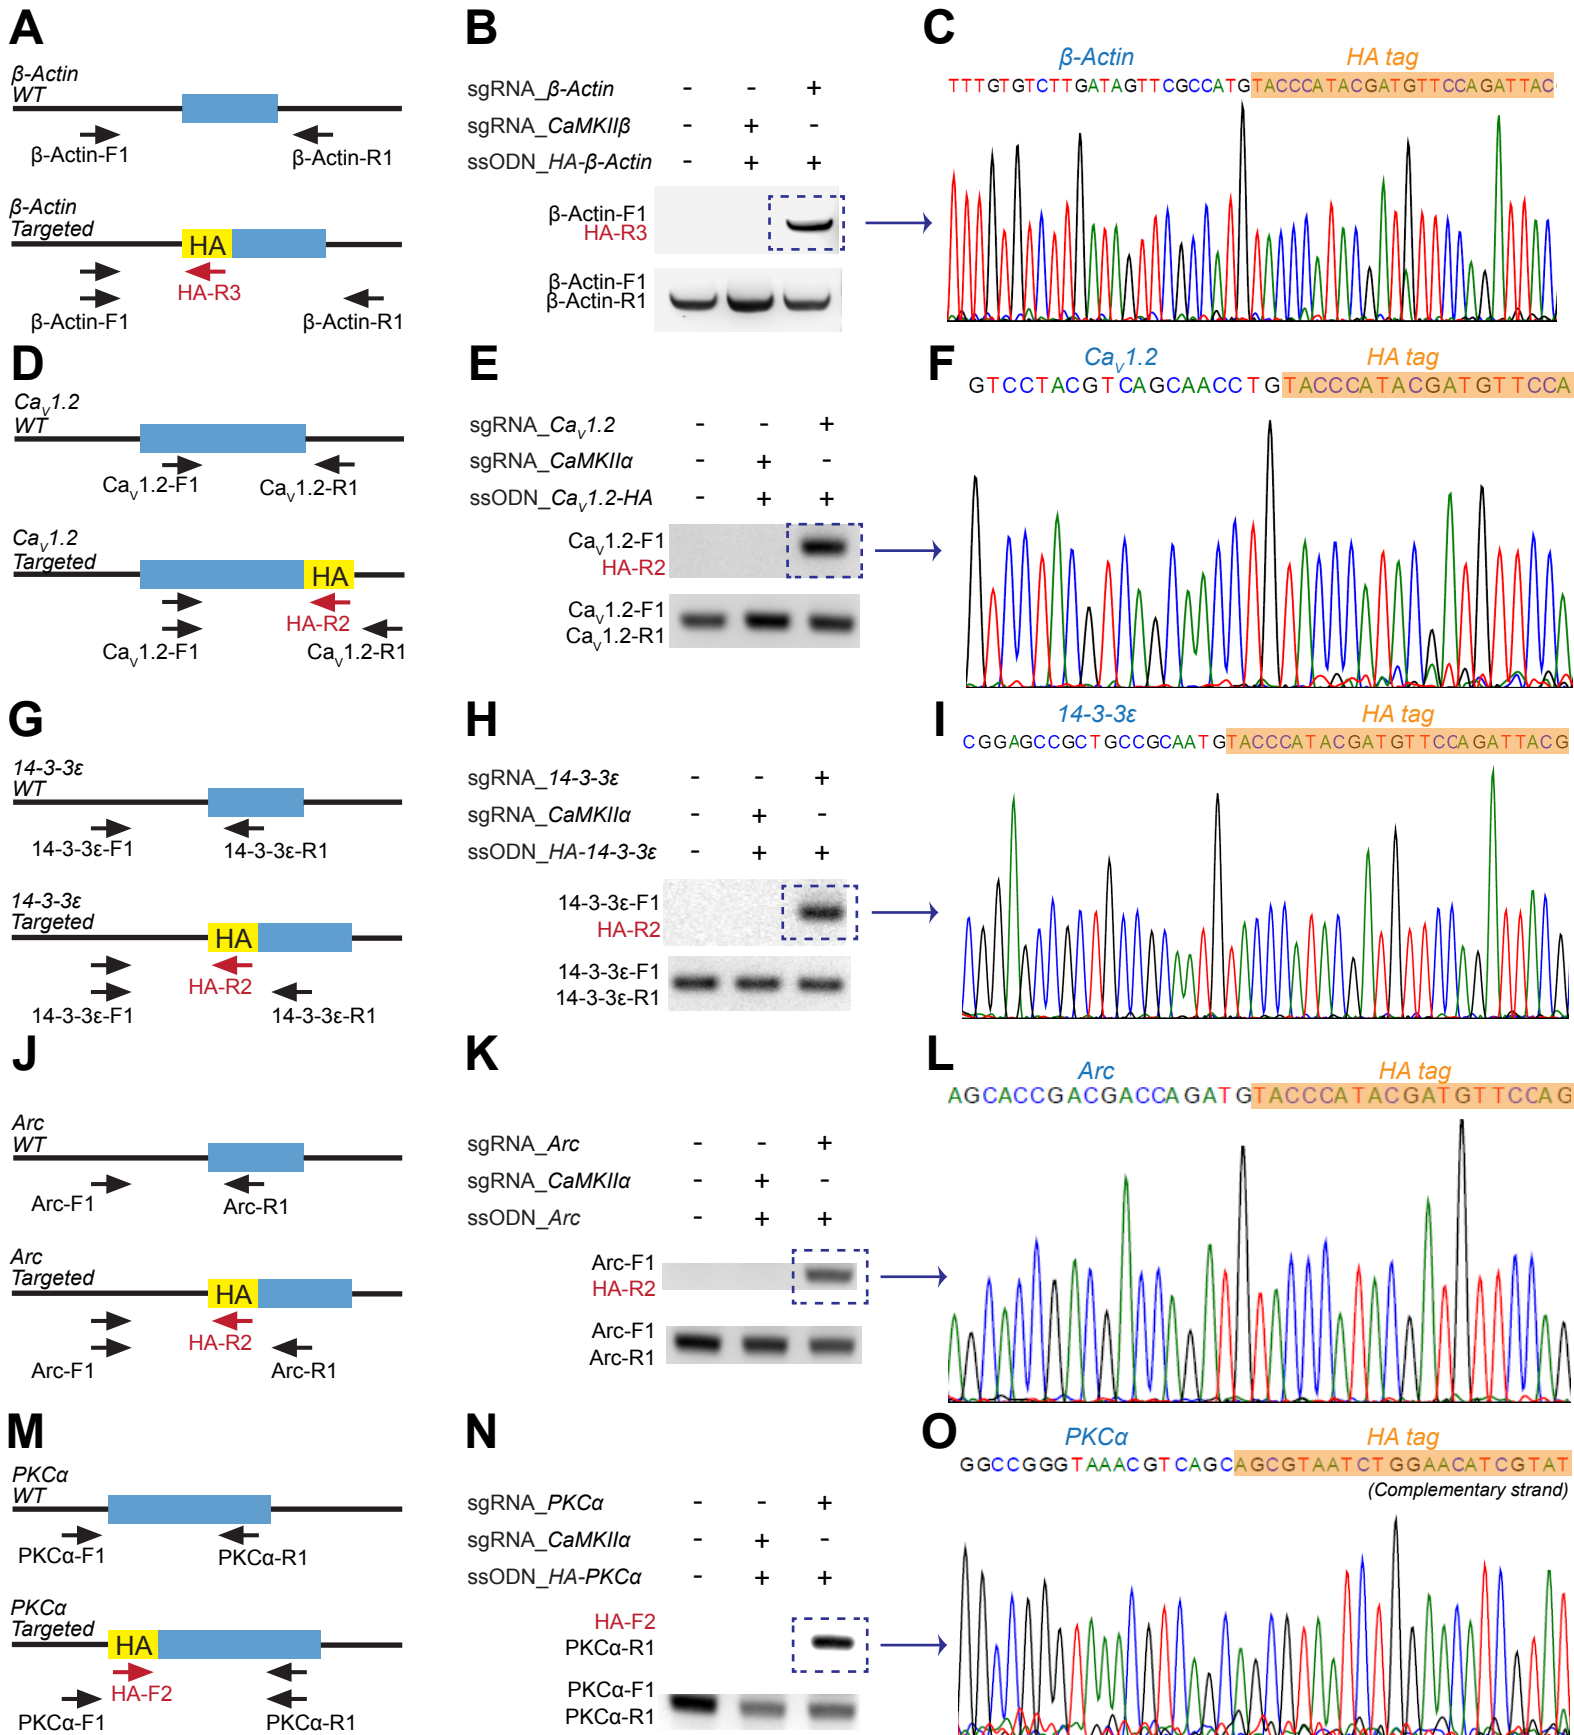

Figure S3

Supplement: NIHMS781210-supplement-3.pdf [file NIHMS781210-supplement-3.pdf]

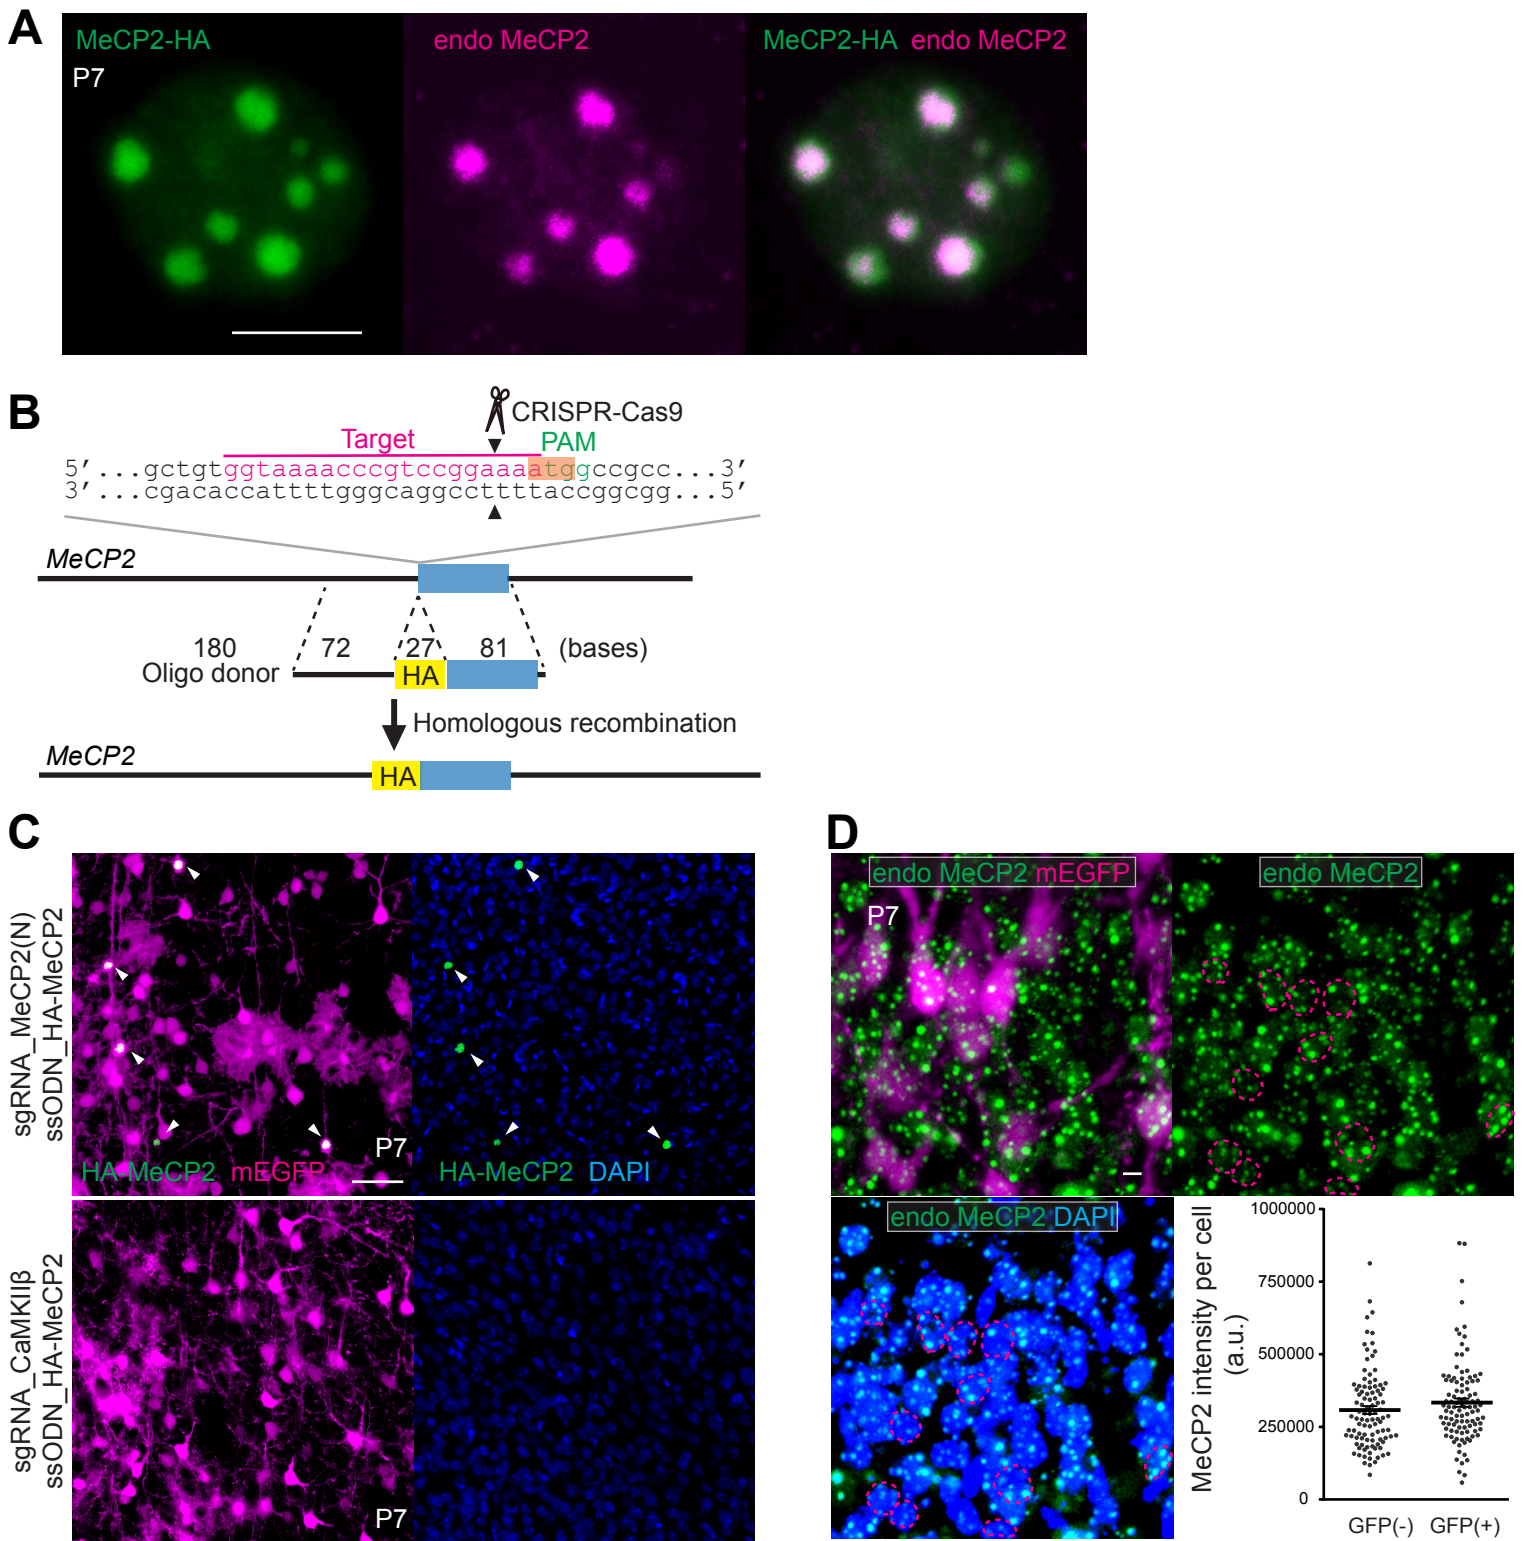

Figure S4

Supplement: NIHMS781210-supplement-4.pdf [file NIHMS781210-supplement-4.pdf]

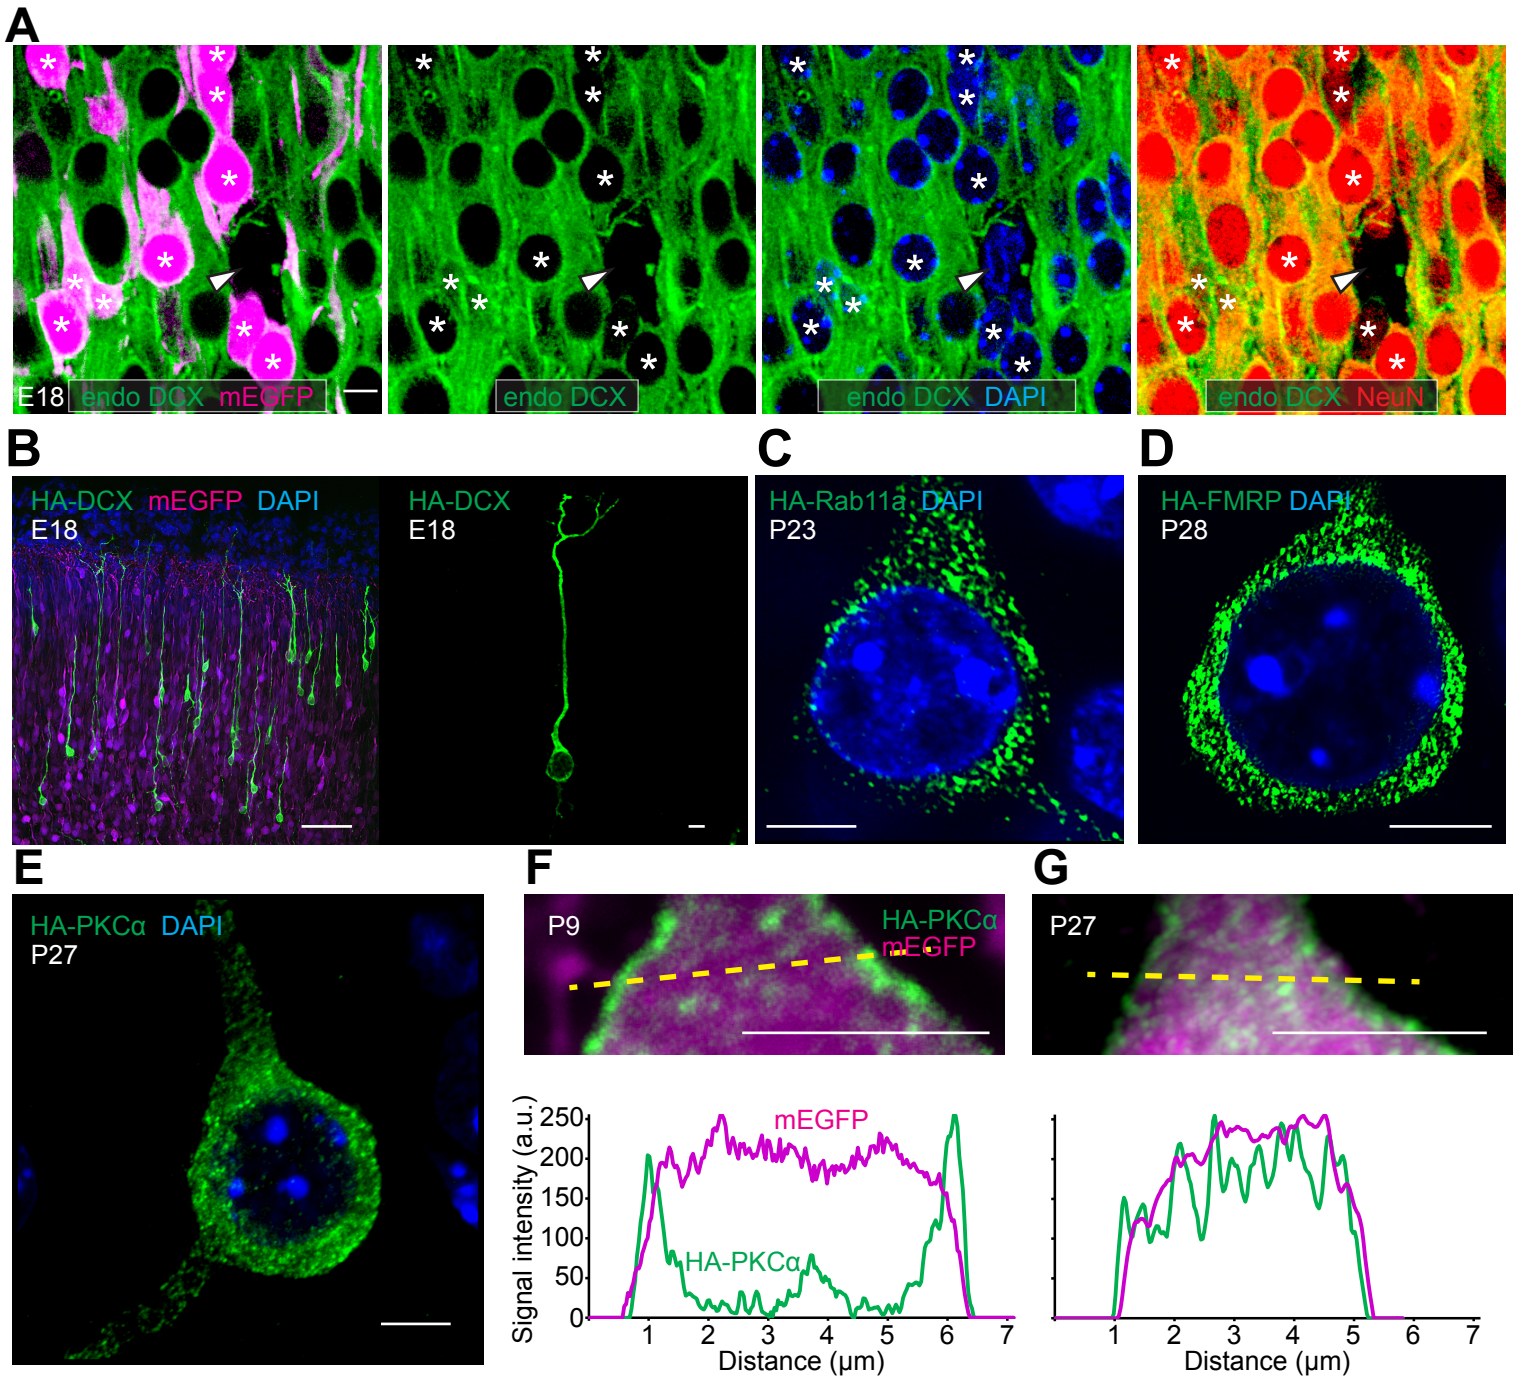

**Figure S5**

Supplement: NIHMS781210-supplement-5.pdf [file NIHMS781210-supplement-5.pdf]

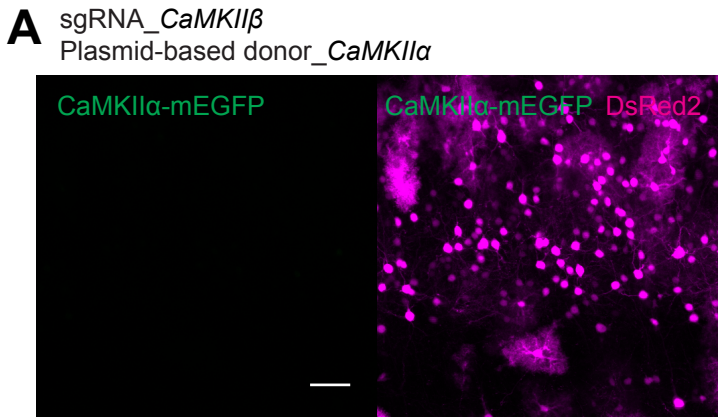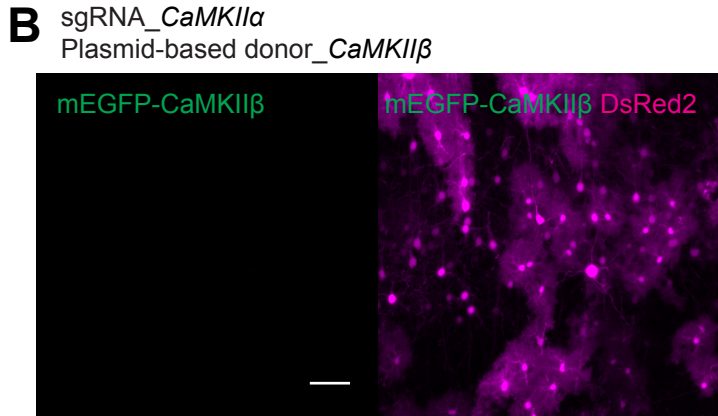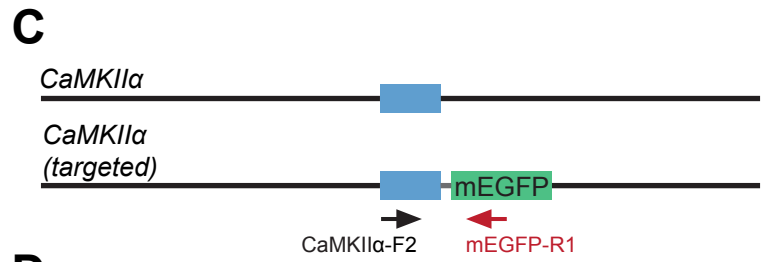

**D**

|                               |   |   |   |
|-------------------------------|---|---|---|
| sgRNA_CaMKII $\alpha$         | - | - | + |
| sgRNA_CaMKII $\beta$          | - | + | - |
| Plasmid donor_CaMKII $\alpha$ | - | + | + |

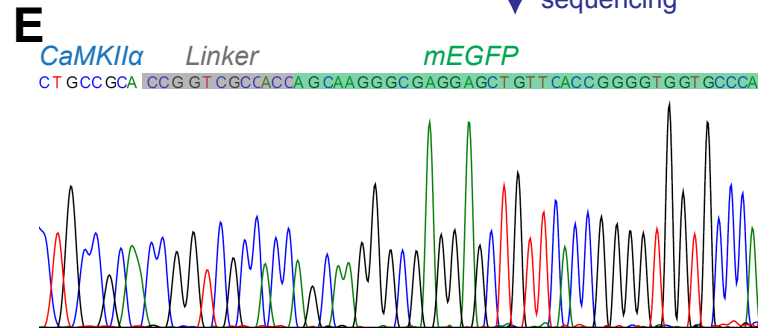

**Figure S6**

Supplement: NIHMS781210-supplement-6.pdf [file NIHMS781210-supplement-6.pdf]
